# Supplementary material for: Sanguisorba officinalis L. derived from herbal medicine prevents intestinal inflammation by inducing autophagy in macrophages
Source: Springer Nature journal article supplement (doi:10.1038/s41598-020-65306-4), 2020-06-19
Supplement: 41598_2020_65306_MOESM2_ESM.pdf [file 41598_2020_65306_MOESM2_ESM.pdf]

## **Sanguisorba Officinalis L. derived from herbal medicine prevents intestinal inflammation by inducing autophagy in innate myeloid cells**

Asuka Yasueda<sup>1</sup>, \*Tsunekazu Mizushima<sup>1,2</sup>, Michiko Murohashi<sup>3</sup>, Hisako Kayama<sup>4,5</sup>, Junichi Nishimura<sup>1</sup>, Koji Wakame<sup>6</sup>, Ken-ichi Komatsu<sup>6</sup>, Takayuki Ogino<sup>1</sup>, Norikatsu Miyoshi<sup>1</sup>, Hidekazu Takahashi<sup>1</sup>, Mamoru Uemura<sup>1</sup>, Chu Matsuda<sup>1</sup>, Toru Kitagawa<sup>1</sup>, Kiyoshi Takeda<sup>2,4</sup>, Toshinori Ito<sup>7</sup>, Shigeomi Shimizu<sup>2</sup>, Yuichiro Doki<sup>1</sup> and Hidetoshi Eguchi<sup>1</sup>

1. Department of Gastroenterological Surgery, Graduate School of Medicine, Osaka University Graduate School of Medicine, 2-2 Yamadaoka, Suita, Osaka, 565-0871, Japan
2. Integrated Frontier Research for Medical Science Division, Institute for Open and Transdisciplinary Research Initiatives, Osaka University, 1-1 Yamadaoka, Suita, Osaka, 565-0871, Japan
3. Department of Pathological Cell Biology, Medical Research Institute, Tokyo Medical and Dental University, 1-5-45, Yushima, Bunkyo-ku, Tokyo, 113-8510, Japan
4. Laboratory of Immune Regulation, Department of Microbiology and Immunology, Graduate School of Medicine, Osaka University Graduate School of Medicine
5. Institute for Advanced Co-Creation Studies, Osaka University
6. Department pharmacology, Hokkaido University of Science, 15-4-1, Maeda shichi-jyo, Teine, Sapporo City, Hokkaido, Japan, 006-8590
7. Osaka Center for Cancer and Cardiovascular Disease Prevention, 1-6-107, Morinomiya, Jyoto-ku, Osaka City, Osaka, Japan, 536-0025

### **Supplemental table**

Supplementary Table S1. Sequences of the primers used for qRT-PCR

| <b>Gene</b>     | <b>Forward primer</b>          | <b>Reverse primer</b>              |
|-----------------|--------------------------------|------------------------------------|
| <i>Arg1</i>     | 5'-GAGCACATGCAGCAGCAGCAG-3'    | 5'-TTTCCTCAGTGCTGCAGGGCC-3'        |
| <i>βcatenin</i> | 5'-GTGCAATTCCTGAGCTGACA-3'     | 5'-CTTAAAGATGGCCAGCAAGC-3'         |
| <i>Cd206</i>    | 5'-TGTGGTGAGCTGAAAGGTGA-3'     | 5'-CAGGTGTGGGCTCAGGTAGT-3'         |
| <i>Claudin7</i> | 5'-CTGGTGTTGGGCTTCTTAGC-3'     | 5'-CAGAAGGACCAGAGCAGACC-3'         |
| <i>Gapdh</i>    | 5'-CCTCGTCCCGTAGACAAAATG-3'    | 5'-TCTCACTTTGCCACTGCAA-3'          |
| <i>Ifny</i>     | 5'-TCAAGTGGCATAGATGTGGAAGAA-3' | 5'-TGGCTCTGCAGGATTTTCATG-3'        |
| <i>Il1b</i>     | 5'-TCAGGCAGGCAGTATCACTCA-3'    | 5'-GGAAGGTCCACGGGAAAGAC-3'         |
| <i>Il6</i>      | 5'-CTGCAAGAGACTTCCATCCAGTT-3'  | 5'-AAGTAGGAAGCCGTGGTT-3'           |
| <i>Il10</i>     | 5'-CTGGGTGAGAAGTGAAGACC-3'     | 5'-CATGGCCTTGTAGACACCTTG-3'        |
| <i>Il12b</i>    | 5'-GGACTACCCTGACTCCTGGAG-3'    | 5'-GATGTCTTCTCTCTACGAGGAAC-3'      |
| <i>Il17a</i>    | 5'-CCCATGGGATTACAACATCAC-3'    | 5'-TTTCCTCAGTGCTGCAGGGCC-3'        |
| <i>Il23</i>     | 5'-CCAGCAGCTCTCTCGGAATCT-3'    | 5'-GGGTCACAACCATCTTCACAC-3'        |
| <i>Muc2</i>     | 5'-ACATCACCTGTCCCGACTTC-3'     | 5'-GAGCAAGGGACTCTGTCTG-3'          |
| <i>Muc3</i>     | 5'-TGTTCAGCTTTACTGTGTTTCAA-3'  | 5'-TTGCATGTCTCCTCAGGATT-3'         |
| <i>Muc13</i>    | 5'-TATTACTACAACCTCGTCTCT-3'    | 5'-CTCTTGATAGCCACAGAGT-3'          |
| <i>Oclaudin</i> | 5'-CCTCCAATGGCAAAGTGAAT-3'     | 5'-CTCCCCACCTGTCGTGTAGT-3'         |
| <i>Reg3g</i>    | 5'-CCTTCCTCTTCCTCAGGCAAT-3'    | 5'-TATTCTCTCTCTCCACTTCAGAAATCCT-3' |
| <i>Relma</i>    | 5'-CCCTTCTCATCTGCATCTCC-3'     | 5'-CAGTAGCAGTCATCCCAGCA-3'         |
| <i>Saa1</i>     | 5'-CATTTGTTACGAGGCTTCC-3'      | 5'-GTTTTTCCAGTTAGCTTCCCTCATGT-3'   |
| <i>Saa2</i>     | 5'-TGTGTATCCCACAAGGTTTCAGA-3'  | 5'-TTATTACCCTCTCCTCCTCAAGCA-3'     |
| <i>Saa3</i>     | 5'-GCAACTACTGGGTTGAGATA-3'     | 5'-GAGCATGGGATTACAACATCC-3'        |
| <i>Tnfa</i>     | 5'-TCCAGGCGGTGCCTATGT-3'       | 5'-CACCCCGAAGTTCAGTAGACAGA-3'      |
